# Supplementary material for: Eating Habits in Patients with Familial Hypercholesterolemia from North-Eastern Romania
Source: Nutrients. 2022 Jul 29;14(15):3124. doi: 10.3390/nu14153124 (PMC9370791; doi:10.3390/nu14153124)
Supplement: Supplementary file 1 [file nutrients-14-03124-s001.zip › nutrients-1806203-supplementary.pdf]

**Table S1.** Favorite food and statistically significant correlations.

| <b>Favorite food</b>  | <b>Yes (mean <math>\pm</math> SD / median (IQR))</b> | <b>No (mean <math>\pm</math> SD / median (IQR))</b> | <b><i>p</i>-value</b> |
|-----------------------|------------------------------------------------------|-----------------------------------------------------|-----------------------|
| <b>FH group</b>       |                                                      |                                                     |                       |
| <b>Meat</b>           |                                                      |                                                     |                       |
| Hemoglobin            | 13.80 (12.70; 14.95)                                 | 13.00 (12.45; 13.75)                                | 0.013                 |
| <b>Salami</b>         |                                                      |                                                     |                       |
| BMI                   | 30.80 $\pm$ 4.84                                     | 27.61 $\pm$ 4.71                                    | 0.009                 |
| Hemoglobin            | 14.30 (13.10; 15.15)                                 | 13.10 (12.45; 14.20)                                | 0.015                 |
| Glucose               | 109.20 (93.45; 131.93)                               | 97.20 (89.35; 106.35)                               | 0.033                 |
| HbA1c                 | 5.84 (5.32; 6.46)                                    | 5.43 (5.10; 5.76)                                   | 0.014                 |
| GPT                   | 29.30 (17.35; 51.80)                                 | 18.00 (15.10; 30.1)                                 | 0.012                 |
| <b>Fruits</b>         |                                                      |                                                     |                       |
| HDL-cholesterol       | 60.83 $\pm$ 15.94                                    | 47.64 $\pm$ 14.62                                   | 0.004                 |
| <b>Bread</b>          |                                                      |                                                     |                       |
| BMI                   | 29.79 $\pm$ 5.09                                     | 27.28 $\pm$ 4.53                                    | 0.036                 |
| GGT                   | 38.10 (21.05; 100.30)                                | 23.00 (19.15; 42.53)                                | 0.015                 |
| <b>Sour cream</b>     |                                                      |                                                     |                       |
| GOT                   | 24.70 (19.02; 31.05)                                 | 17.65 (15.00; 22.52)                                | 0.007                 |
| GPT                   | 28.80 (17.50; 49.50)                                 | 17.60 (15.72; 28.82)                                | 0.019                 |
| GGT                   | 44.60 (25.80; 105.55)                                | 22.60 (18.07; 41.70)                                | <0.001                |
| <b>Potatoes</b>       |                                                      |                                                     |                       |
| BMI                   | 29.75 $\pm$ 5.06                                     | 26.83 $\pm$ 4.24                                    | 0.018                 |
| HbA1c                 | 5.76 (5.21; 6.03)                                    | 5.35 (4.95; 5.70)                                   | 0.020                 |
| GGT                   | 38.55 (24.35; 85.10)                                 | 19.95 (17.82; 37.32)                                | 0.001                 |
| <b>Cakes</b>          |                                                      |                                                     |                       |
| Creatinine            | 0.92 (0.86; 1.08)                                    | 1.04 (0.93; 1.13)                                   | 0.040                 |
| <b>Sweets</b>         |                                                      |                                                     |                       |
| Glucose               | 102.70 (91.30; 114.80)                               | 98.20 (88.10; 109.20)                               | 0.046                 |
| <b>Fast food</b>      |                                                      |                                                     |                       |
| GPT                   | 28.30 (18.95; 62.70)                                 | 18.90 (15.50; 31.75)                                | 0.043                 |
| <b>Control group</b>  |                                                      |                                                     |                       |
| <b>Vegetables</b>     |                                                      |                                                     |                       |
| Hemoglobin            | 13.44 $\pm$ 0.96                                     | 11.86 $\pm$ 1.99                                    | 0.026                 |
| LDL-cholesterol       | 140.76 $\pm$ 31.17                                   | 82.42 $\pm$ 34.06                                   | 0.002                 |
| <b>Cheese</b>         |                                                      |                                                     |                       |
| Hemoglobin            | 13.81 $\pm$ 0.75                                     | 11.90 $\pm$ 1.44                                    | 0.001                 |
| Proteins              | 8.09 (7.38; 8.70)                                    | 6.70 (6.66; 7.53)                                   | 0.016                 |
| Creatinine clearance  | 89.91 $\pm$ 15.42                                    | 72.62 $\pm$ 18.42                                   | 0.035                 |
| <b>Dairy products</b> |                                                      |                                                     |                       |
| Iron                  | 88.68 $\pm$ 27.00                                    | 67.05 $\pm$ 14.50                                   | 0.037                 |
| GPT                   | 24.10 (19.01; 31.40)                                 | 15.70 (12.40; 20.35)                                | 0.046                 |
| <b>Cakes</b>          |                                                      |                                                     |                       |
| GGT                   | 18.30 (14.47; 27.17)                                 | 28.10 (22.02; 55.25)                                | 0.041                 |
| <b>Juices</b>         |                                                      |                                                     |                       |
| Triglycerides         | 92.25 (75.65; 99.22)                                 | 117.80 (94.52; 170.15)                              | 0.033                 |

FH, familial hypercholesterolemia; BMI, body mass index; HbA1c, glycated hemoglobin; GPT, alanine aminotransferase; HDL, high-density lipoprotein; GGT, gamma-glutamyl transferase; GOT, aspartate transaminase; LDL, low-density lipoprotein; SD, standard deviation; IQR, Inter-quartile range.

**Table S2.** Favorite food.

|                | 18–24 years | 25–34 years | 35–44 years | 45–54 years | 55–64 years | 65–74 years | >75 years |
|----------------|-------------|-------------|-------------|-------------|-------------|-------------|-----------|
| Bread          | 0 (0%)      | 2 (66.7%)   | 3 (42.9%)   | 13 (65%)    | 12 (54.5%)  | 9 (75%)     | 2 (50%)   |
| Meat           | 2 (100%)    | 2 (66.7%)   | 6 (85.7%)   | 16 (80%)    | 17 (77.3%)  | 8 (66.7%)   | 3 (75%)   |
| Vegetables     | 2 (100%)    | 1 (33.3%)   | 7 (100%)    | 16 (80%)    | 21 (95.5%)  | 8 (66.7%)   | 4 (100%)  |
| Cakes          | 1 (50%)     | 3 (100%)    | 4 (57.1%)   | 12 (60%)    | 9 (40.9%)   | 4 (33.3%)   | 2 (50%)   |
| Cheese         | 0 (0%)      | 2 (66.7%)   | 7 (100%)    | 12 (60%)    | 18 (81.8%)  | 11 (91.7%)  | 3 (75%)   |
| Dairy products | 1 (50%)     | 1 (33.3%)   | 5 (71.4%)   | 11 (55%)    | 17 (77.3%)  | 9 (75%)     | 3 (75%)   |
| Juices         | 0 (0%)      | 0 (0%)      | 3 (42.9%)   | 3 (15%)     | 2 (9.1%)    | 1 (8.3%)    | 1 (25%)   |
| Sweets         | 0 (0%)      | 3 (100%)    | 5 (71.4%)   | 13 (65%)    | 9 (40.9%)   | 3 (25%)     | 1 (25%)   |
| Fruits         | 1 (50%)     | 2 (66.7%)   | 5 (71.4%)   | 16 (80%)    | 20 (90.9%)  | 7 (58.3%)   | 3 (75%)   |
| Sour cream     | 0 (0%)      | 1 (33.3%)   | 3 (42.9%)   | 8 (40%)     | 13 (59.1%)  | 4 (33.3%)   | 1 (25%)   |
| Potatoes       | 1 (50%)     | 2 (66.7%)   | 3 (42.9%)   | 15 (75%)    | 13 (59.1%)  | 9 (75%)     | 3 (75%)   |
| Salami         | 1 (50%)     | 1 (33.3%)   | 2 (28.6%)   | 7 (35%)     | 9 (40.9%)   | 4 (33.3%)   | 1 (25%)   |
| Fast-food      | 1 (50%)     | 1 (33.3%)   | 2 (28.6%)   | 4 (20%)     | 3 (13.6%)   | 2 (16.7%)   | 0 (0%)    |

**Table S3.** Types of fats used for cooking or consumed and statistically significant correlations.

| Preferred fats      | Yes (mean ± SD / median (IQR)) | No (mean ± SD / median (IQR)) | p-value |
|---------------------|--------------------------------|-------------------------------|---------|
| <b>Bacon</b>        |                                |                               |         |
| Hemoglobin          | 14.54 ± 1.08                   | 13.35 ± 1.38                  | 0.003   |
| GGT                 | 47.60 (32.00; 98.60)           | 25.80 (18.80; 46.00)          | 0.008   |
| GPT                 | 31.00 (17.50; 49.80)           | 18.90 (15.30; 31.30)          | 0.022   |
| Glucose             | 108.50 (97.20; 115.40)         | 96.90 (88.50; 108.10)         | 0.045   |
| Glycated hemoglobin | 5.88 (5.43; 6.13)              | 5.42 (5.09; 5.82)             | 0.014   |
| Uric acid           | 4.95 (4.28; 5.38)              | 3.86 (3.36; 4.77)             | 0.008   |
| Tryglicerides       | 217.30 (129.30; 377.70)        | 157.00 (103.10; 205.00)       | 0.019   |
| <b>Butter</b>       |                                |                               |         |
| Iron                | 88.51 ± 24.49                  | 102.02 ± 28.15                | 0.036   |
| GGT                 | 25.20 (18.55; 43.62)           | 40.50 (22.10; 80.35)          | 0.042   |
| Urea                | 30.90 (25.22; 30.90)           | 36.90 (28.87; 40.67)          | 0.022   |
| Glucose             | 96.10 (86.62; 96.10)           | 103.15 (91.90; 114.60)        | 0.042   |
| Glycated hemoglobin | 5.33 (5.01; 5.83)              | 5.59 (5.30; 6.00)             | 0.049   |
| <b>Sour cream</b>   |                                |                               |         |
| GGT                 | 44.60 (23.7; 103.85)           | 24.70 (19.02; 39.30)          | 0.003   |
| GOT                 | 24.1 (17.9; 30.95)             | 17.40 (14.87; 23.07)          | 0.007   |
| GPT                 | 29.70 (18.00; 48.30)           | 17.10 (14.65; 25.45)          | 0.001   |
| Proteins            | 7.33 (7.05; 7.78)              | 7.11 (6.83; 7.58)             | 0.036   |
| Uric acid           | 4.55 (3.60; 5.26)              | 3.84 (3.27; 4.66)             | 0.038   |
| <b>Oil</b>          |                                |                               |         |
| Creatinine          | 1.02 (0.91; 1.12)              | 0.087 (0.076; 0.095)          | 0.009   |
| Uric acid           | 4.32 (3.49; 5.17)              | 3.42 (2.89; 3.90)             | 0.021   |
| Triglycerides       | 167.00 (117.79; 235.90)        | 86.50 (67.50; 120.50)         | 0.029   |
| <b>Margarine</b>    |                                |                               |         |
| Proteins            | 7.62 (7.12; 7.83)              | 7.14 (6.87; 7.43)             | 0.017   |

**Table S4.** Fats used for cooking or consumed.

|               | 18–24 years | 25–34 years | 35–44 years | 45–54 years | 55–64 years | 65–74 years | >75 years |
|---------------|-------------|-------------|-------------|-------------|-------------|-------------|-----------|
| Butter        | 2 (100%)    | 3 (100%)    | 3 (42.9%)   | 8 (40%)     | 11 (50%)    | 5 (41.7%)   | 2 (50%)   |
| Lard          | 0 (0%)      | 0 (0%)      | 0 (0%)      | 5 (25%)     | 1 (4.5%)    | 4 (33.3%)   | 1 (25%)   |
| Margarine     | 0 (0%)      | 0 (0%)      | 1 (14.3%)   | 6 (30%)     | 3 (13.6%)   | 2 (16.7%)   | 1 (25%)   |
| Oil           | 1 (50%)     | 3 (100%)    | 6 (85.7%)   | 18 (90%)    | 21 (95.5%)  | 11 (91.7%)  | 3 (75%)   |
| Sour cream    | 0 (0%)      | 3 (100%)    | 4 (57.1%)   | 9 (45%)     | 12 (54.5%)  | 4 (33.3%)   | 0 (0%)    |
| Bacon         | 0 (0%)      | 0 (0%)      | 0 (0%)      | 7 (35%)     | 5 (22.7%)   | 1 (8.3%)    | 2 (50%)   |
| Whipped cream | 0 (0%)      | 0 (0%)      | 1 (14.3%)   | 5 (25%)     | 3 (13.6%)   | 2 (16.7%)   | 0 (0%)    |

**Table S5.** Frequency of the eating habits and statistically significant differences.

| <b>FH group</b>  |                              |                             | <b><i>p</i>-value</b> |
|------------------|------------------------------|-----------------------------|-----------------------|
| Other vegetables |                              |                             |                       |
| Urea             | 2<br>27.25 (21.30; 31.39)    | 3<br>36.90 (29.90; 40.20)   | 0.029                 |
| Beef/pork        |                              |                             |                       |
| Urea             | 1<br>31.1 (23.30; 33.65)     | 3<br>38.15 (30.47; 42.45)   | 0.031                 |
| Fish             |                              |                             |                       |
| GOT              | 1<br>20.50 (16.57; 27.97)    | 3<br>12.70 (11.62; 14.07)   | 0.009                 |
|                  | 2<br>20.30 (16.60; 28.05)    | 3<br>12.70 (11.62; 14.07)   | 0.013                 |
| GPT              | 1<br>20.55 (16.12; 36.52)    | 3<br>10.85 (8.22; 15.65)    | 0.026                 |
|                  | 2<br>21.55 (16.57; 33.85)    | 3<br>10.85 (8.22; 15.65)    | 0.021                 |
| TC               | 2<br>296.00 (257.00; 331.50) | 3<br>210 (145.75; 261.50)   | 0.025                 |
| Non-HDL          | 2<br>247.55 (199.80; 267.30) | 3<br>140.95 (98.92; 188.82) | 0.009                 |

1 — less than 2 times/week, 2 — 2–3 times/week, 3 — 4–6 times/week, 4 — daily. TC, total cholesterol.

|                  | 18–24 years | 25–34 years | 35–44 years | 45–54 years | 55–64 years | 65–74 years | >75 years |
|------------------|-------------|-------------|-------------|-------------|-------------|-------------|-----------|
| Bread            |             |             |             |             |             |             |           |
| <2x/week         | 0 (0%)      | 0 (0%)      | 2 (28.6%)   | 0 (0%)      | 1 (4.5%)    | 0 (0%)      | 0 (0%)    |
| 2–3x/week        | 2 (100%)    | 0 (0%)      | 0 (0%)      | 2 (10%)     | 4 (18.2%)   | 1 (8.3%)    | 0 (0%)    |
| 4–6x/week        | 0 (0%)      | 1 (33.3%)   | 1 (14.3%)   | 2 (10%)     | 1 (4.5%)    | 5 (41.7%)   | 2 (50%)   |
| Daily            | 0 (0%)      | 2 (66.7%)   | 4 (57.1%)   | 16 (72.7%)  | 16 (72.7%)  | 6 (50%)     | 2 (50%)   |
| Pasta            |             |             |             |             |             |             |           |
| <2x/week         | 2 (100%)    | 2 (66.7%)   | 3 (42.9%)   | 11 (55.5%)  | 16 (72.7%)  | 6 (50%)     | 2 (50%)   |
| 2–3x/week        | 0 (0%)      | 0 (0%)      | 4 (57.1%)   | 7 (35%)     | 5 (22.7%)   | 6 (50%)     | 2 (50%)   |
| 4–6x/week        | 0 (0%)      | 0 (0%)      | 0 (0%)      | 1 (5%)      | 1 (4.5%)    | 0 (0%)      | 0 (0%)    |
| Daily            | 0 (0%)      | 1 (33.3%)   | 0 (0%)      | 1 (5%)      | 0 (0%)      | 0 (0%)      | 0 (0%)    |
| Potatoes         |             |             |             |             |             |             |           |
| <2x/week         | 1 (50%)     | 1 (33.3%)   | 2 (28.6%)   | 4 (20%)     | 12 (54.5%)  | 2 (16.7%)   | 0 (0%)    |
| 2–3x/week        | 0 (0%)      | 2 (66.7%)   | 4 (57.1%)   | 12 (60%)    | 7 (31.8%)   | 7 (58.3%)   | 3 (75%)   |
| 4–6x/week        | 1 (50%)     | 0 (0%)      | 1 (14.3%)   | 3 (15%)     | 3 (13.6%)   | 2 (16.7%)   | 1 (25%)   |
| Daily            | 0 (0%)      | 0 (0%)      | 0 (0%)      | 1 (5%)      | 0 (0%)      | 1 (8.3%)    | 0 (0%)    |
| Green peas       |             |             |             |             |             |             |           |
| <2x/week         | 1 (50%)     | 3 (100%)    | 5 (71.4%)   | 11 (55%)    | 14 (63.6%)  | 6 (50%)     | 2 (50%)   |
| 2–3x/week        | 1 (50%)     | 0 (0%)      | 2 (28.6%)   | 8 (40%)     | 8 (36.4%)   | 4 (33.3%)   | 1 (25%)   |
| 4–6x/week        | 0 (0%)      | 0 (0%)      | 0 (0%)      | 1 (5%)      | 0 (0%)      | 2 (16.7%)   | 1 (25%)   |
| Daily            | 0 (0%)      | 0 (0%)      | 0 (0%)      | 0 (0%)      | 0 (0%)      | 0 (0%)      | 0 (0%)    |
| Other vegetables |             |             |             |             |             |             |           |
| <2x/week         | 0 (0%)      | 0 (0%)      | 0 (0%)      | 4 (20%)     | 2 (9.1%)    | 1 (8.3%)    | 1 (25%)   |
| 2–3x/week        | 0 (0%)      | 2 (66.7%)   | 0 (0%)      | 6 (30%)     | 4 (18.2%)   | 1 (8.3%)    | 1 (25%)   |
| 4–6x/week        | 1 (50%)     | 1 (33.3%)   | 2 (28.6%)   | 7 (35%)     | 9 (40.9%)   | 7 (58.3%)   | 0 (0%)    |
| Daily            | 1 (50%)     | 0 (0%)      | 5 (71.4%)   | 3 (15%)     | 7 (31.8%)   | 3 (25%)     | 2 (50%)   |
| Fruits           |             |             |             |             |             |             |           |
| <2x/week         | 1 (50%)     | 0 (0%)      | 0 (0%)      | 3 (15%)     | 1 (4.5%)    | 2 (16.7%)   | 0 (0%)    |
| 2–3x/week        | 0 (0%)      | 0 (0%)      | 1 (14.3%)   | 4 (20%)     | 3 (13.6%)   | 2 (16.7%)   | 0 (0%)    |
| 4–6x/week        | 0 (0%)      | 3 (100%)    | 1 (14.3%)   | 8 (40%)     | 6 (27.3%)   | 5 (41.7%)   | 1 (25%)   |
| Daily            | 1 (50%)     | 0 (0%)      | 5 (71.4%)   | 5 (25%)     | 12 (54.5%)  | 3 (25%)     | 3 (75%)   |
| Dairy products   |             |             |             |             |             |             |           |
| <2x/week         | 1 (50%)     | 0 (0%)      | 0 (0%)      | 7 (35%)     | 4 (18.2%)   | 0 (0%)      | 1 (25%)   |
| 2–3x/week        | 1 (50%)     | 1 (33.3%)   | 1 (14.3%)   | 7 (35%)     | 10 (45.5%)  | 7 (58.3%)   | 1 (25%)   |
| 4–6x/week        | 0 (0%)      | 2 (66.7%)   | 2 (28.6%)   | 4 (20%)     | 6 (27.3%)   | 2 (16.7%)   | 1 (25%)   |
| Daily            | 0 (0%)      | 0 (0%)      | 4 (57.1%)   | 2 (10%)     | 2 (9.1%)    | 3 (25%)     | 1 (25%)   |
| Beef/pork        |             |             |             |             |             |             |           |
| <2x/week         | 1 (50%)     | 1 (33.3%)   | 0 (0%)      | 6 (30%)     | 9 (40.9%)   | 3 (25%)     | 1 (25%)   |
| 2–3x/week        | 0 (0%)      | 1 (33.3%)   | 5 (71.4%)   | 9 (45%)     | 7 (31.8%)   | 5 (41.7%)   | 1 (25%)   |
| 4–6x/week        | 1 (50%)     | 1 (33.3%)   | 2 (28.6%)   | 4 (20%)     | 6 (27.3%)   | 4 (33.3%)   | 2 (50%)   |
| Daily            | 0 (0%)      | 0 (0%)      | 0 (0%)      | 1 (5%)      | 0 (0%)      | 0 (0%)      | 0 (0%)    |
| Chicken          |             |             |             |             |             |             |           |
| <2x/week         | 0 (0%)      | 0 (0%)      | 1 (14.3%)   | 2 (10%)     | 7 (31.8%)   | 6 (50%)     | 4 (100%)  |
| 2–3x/week        | 1 (50%)     | 1 (33.3%)   | 2 (28.6%)   | 14 (70%)    | 10 (45.5%)  | 4 (33.3%)   | 0 (0%)    |
| 4–6x/week        | 0 (0%)      | 2 (66.7%)   | 3 (42.9%)   | 2 (10%)     | 4 (18.2%)   | 2 (16.7%)   | 0 (0%)    |
| Daily            | 1 (50%)     | 0 (0%)      | 1 (14.3%)   | 2 (10%)     | 1 (4.5%)    | 0 (0%)      | 0 (0%)    |
| Fish             |             |             |             |             |             |             |           |

|                    |          |           |           |          |            |            |          |
|--------------------|----------|-----------|-----------|----------|------------|------------|----------|
| <2x/week           | 1 (50%)  | 3 (100%)  | 3 (42.9%) | 14 (70%) | 13 (59.1%) | 7 (58.3%)  | 3 (75%)  |
| 2–3x/week          | 1 (50%)  | 0 (0%)    | 2 (28.6%) | 4 (20%)  | 9 (40.9%)  | 5 (41.7%)  | 1 (25%)  |
| 4–6x/week          | 0 (0%)   | 0 (0%)    | 2 (28.6%) | 2 (10%)  | 0 (0%)     | 0 (0%)     | 0 (0%)   |
| Daily              | 0 (0%)   | 0 (0%)    | 0 (0%)    | 0 (0%)   | 0 (0%)     | 0 (0%)     | 0 (0%)   |
| <b>Fried food</b>  |          |           |           |          |            |            |          |
| <2x/week           | 0 (0%)   | 1 (33.3%) | 3 (42.9%) | 4 (20%)  | 8 (36.4%)  | 3 (25%)    | 2 (50%)  |
| 2–3x/week          | 1 (50%)  | 1 (33.3%) | 2 (28.6%) | 8 (40%)  | 7 (31.8%)  | 4 (33.3%)  | 1 (25%)  |
| 4–6x/week          | 1 (50%)  | 1 (33.3%) | 2 (28.6%) | 7 (35%)  | 6 (27.3%)  | 4 (33.3%)  | 1 (25%)  |
| Daily              | 0 (0%)   | 0 (0%)    | 0 (0%)    | 1 (5%)   | 1 (4.5%)   | 1 (8.3%)   | 0 (0%)   |
| <b>Sweets</b>      |          |           |           |          |            |            |          |
| <2x/week           | 0 (0%)   | 0 (0%)    | 1 (14.3%) | 4 (20%)  | 7 (31.8%)  | 6 (50%)    | 2 (50%)  |
| 2–3x/week          | 2 (100%) | 0 (0%)    | 3 (42.9%) | 9 (45%)  | 8 (36.4%)  | 5 (41.7%)  | 1 (25%)  |
| 4–6x/week          | 0 (0%)   | 2 (66.7%) | 1 (14.3%) | 6 (30%)  | 4 (18.2%)  | 0 (0%)     | 0 (0%)   |
| Daily              | 0 (0%)   | 1 (33.3%) | 2 (28.6%) | 1 (5%)   | 3 (13.6%)  | 1 (8.3%)   | 1 (25%)  |
| <b>Soft juices</b> |          |           |           |          |            |            |          |
| <2x/week           | 2 (100%) | 3 (100%)  | 3 (42.9%) | 16 (80%) | 18 (81.8%) | 11 (91.7%) | 4 (100%) |
| 2–3x/week          | 0 (0%)   | 0 (0%)    | 3 (42.9%) | 2 (10%)  | 3 (13.6%)  | 1 (8.3%)   | 0 (0%)   |
| 4–6x/week          | 0 (0%)   | 0 (0%)    | 0 (0%)    | 2 (10%)  | 1 (4.5%)   | 0 (0%)     | 0 (0%)   |
| Daily              | 0 (0%)   | 0 (0%)    | 1 (14.3%) | 0 (0%)   | 0 (0%)     | 0 (0%)     | 0 (0%)   |
| <b>Fast-food</b>   |          |           |           |          |            |            |          |
| <2x/week           | 1 (50%)  | 2 (66.7%) | 4 (57.1%) | 16 (80%) | 21 (95.5%) | 10 (83.3%) | 4 (100%) |
| 2–3x/week          | 1 (50%)  | 0 (0%)    | 2 (28.6%) | 4 (20%)  | 1 (4.5%)   | 2 (16.7%)  | 0 (0%)   |
| 4–6x/week          | 0 (0%)   | 1 (33.3%) | 0 (0%)    | 0 (0%)   | 0 (0%)     | 0 (0%)     | 0 (0%)   |
| Daily              | 0 (0%)   | 0 (0%)    | 1 (14.3%) | 0 (0%)   | 0 (0%)     | 0 (0%)     | 0 (0%)   |

**Table S7.** What situation makes you eat more?

|            | 18–24 years | 25–34 years | 35–44 years | 45–54 years | 55–64 years | 65–74 years | >75 years |
|------------|-------------|-------------|-------------|-------------|-------------|-------------|-----------|
| Loneliness | 0 (0%)      | 0 (0%)      | 0 (0%)      | 6 (30%)     | 5 (22.7%)   | 2 (16.7%)   | 1 (25%)   |
| Boredom    | 0 (0%)      | 1 (33.3%)   | 3 (42.9%)   | 10 (50%)    | 10 (45.5%)  | 5 (41.7%)   | 0 (0%)    |
| Sadness    | 0 (0%)      | 1 (33.3%)   | 2 (28.6%)   | 8 (40%)     | 6 (27.3%)   | 4 (33.3%)   | 2 (50%)   |
| Depression | 0 (0%)      | 0 (0%)      | 1 (14.3%)   | 3 (15%)     | 3 (13.6%)   | 2 (16.7%)   | 1 (25%)   |
| Stress     | 1 (50%)     | 2 (66.7%)   | 3 (42.9%)   | 8 (40%)     | 6 (27.3%)   | 3 (25%)     | 1 (25%)   |
| In society | 0 (0%)      | 0 (0%)      | 2 (28.6%)   | 4 (20%)     | 3 (13.6%)   | 4 (33.3%)   | 2 (50%)   |
| Weekend    | 1 (50%)     | 1 (33.3%)   | 4 (57.1%)   | 8 (40%)     | 7 (31.8%)   | 5 (41.7%)   | 3 (75%)   |
| Television | 0 (0%)      | 2 (66.7%)   | 0 (0%)      | 7 (35%)     | 5 (22.7%)   | 3 (25%)     | 1 (25%)   |

**Table S8.** What do you feel after you eat more than you should?

|                | 18–24 years | 25–34 years | 35–44 years | 45–54 years | 55–64 years | 65–74 years | >75 years |
|----------------|-------------|-------------|-------------|-------------|-------------|-------------|-----------|
| Depression     | 0 (0%)      | 0 (0%)      | 0 (0%)      | 2 (10%)     | 4 (18.2%)   | 1 (8.3%)    | 0 (0%)    |
| Guilt          | 0 (0%)      | 2 (66.7%)   | 2 (28.6%)   | 7 (35%)     | 8 (36.4%)   | 3 (25%)     | 0 (0%)    |
| Satisfaction   | 0 (0%)      | 2 (66.7%)   | 0 (0%)      | 2 (10%)     | 3 (13.6%)   | 2 (16.7%)   | 0 (0%)    |
| Nothing        | 2 (100%)    | 0 (0%)      | 2 (28.6%)   | 5 (25%)     | 6 (27.3%)   | 0 (0%)      | 4 (100%)  |
| Skip next meal | 0 (0%)      | 2 (66.7%)   | 3 (42.9%)   | 4 (20%)     | 3 (13.6%)   | 5 (41.7%)   | 1 (25%)   |
| Exercise       | 0 (0%)      | 0 (0%)      | 2 (28.6%)   | 7 (35%)     | 6 (27.3%)   | 6 (50%)     | 0 (0%)    |
